# Supplementary material
Source: ML conference proceedings conference paper supplement (https://proceedings.neurips.cc/paper_files/paper/2012/hash/93d65641ff3f1586614cf2c1ad240b6c-Abstract.html)
Supplement: Supplementary file [file 93d65641ff3f1586614cf2c1ad240b6c-Supplemental.zip]

---

## Supplementary material for Reducing statistical time-series problems to binary classification

---

**Theorem 1.** Let  $\mathbf{H} = (\mathcal{H}_1, \mathcal{H}_2, \dots)$ ,  $\mathcal{H}_k \subset \mathcal{X}^k$ ,  $k \in \mathbb{N}$  be a sequence of separable sets of indicator functions of finite VC dimension such that  $\mathcal{H}_k$  generates  $\mathcal{F}_{\mathcal{X}^k}$ . Then, for every stationary ergodic time series distributions  $\rho_X$  and  $\rho_Y$  generating samples  $X_{1..n}$  and  $Y_{1..m}$  we have

$$\lim_{n, m \rightarrow \infty} \hat{D}_{\mathbf{H}}(X_{1..n}, Y_{1..m}) = D_{\mathbf{H}}(\rho_X, \rho_Y) \quad (1)$$

*Proof.* As is established in [2], under the conditions of the theorem we have

$$\lim_{n \rightarrow \infty} \sup_{h \in \mathcal{H}_k} \frac{1}{n - k + 1} \sum_{i=1}^{n-k+1} h(X_{i..i+k-1}) = \sup_{h \in \mathcal{H}_k} \mathbf{E}_{\rho_X} h(X_1, \dots, X_k) \quad \rho_X\text{-a.s.} \quad (2)$$

for all  $k \in \mathbb{N}$ , and likewise for  $\rho_Y$ . Fix an  $\varepsilon > 0$ . We can find a  $T \in \mathbb{N}$  such that

$$\sum_{k > T} w_k \leq \varepsilon. \quad (3)$$

Note that  $T$  depends only on  $\varepsilon$ . Moreover, as follows from (2), for each  $k = 1..T$  we can find an  $N_k$  such that

$$\left| \sup_{h \in \mathcal{H}_k} \frac{1}{n - k + 1} \sum_{i=1}^{n-k+1} h(X_{i..i+k-1}) - \sup_{h \in \mathcal{H}_k} \mathbf{E}_{\rho_X} h(X_{1..k}) \right| \leq \varepsilon/T \quad (4)$$

Let  $N_k := \max_{i=1..T} N_i$  and define analogously  $M$  for  $\rho_Y$ . Thus, for  $n \geq N$ ,  $m \geq M$  we have

$$\begin{aligned} & \hat{D}_{\mathbf{H}}(X_{1..n}, Y_{1..m}) \\ & \leq \sum_{k=1}^T w_k \sup_{h \in \mathcal{H}_k} \left| \frac{1}{n - k + 1} \sum_{i=1}^{n-k+1} h(X_{i..i+k-1}) - \frac{1}{m - k + 1} \sum_{i=1}^{m-k+1} h(Y_{i..i+k-1}) \right| + \varepsilon \\ & \leq \sum_{k=1}^T w_k \sup_{h \in \mathcal{H}_k} \left\{ \left| \frac{1}{n - k + 1} \sum_{i=1}^{n-k+1} h(X_{i..i+k-1}) - \mathbf{E}_{\rho_1} h(X_{1..k}) \right| \right. \\ & \quad \left. + |\mathbf{E}_{\rho_1} h(X_{1..k}) - \mathbf{E}_{\rho_2} h(Y_{1..k})| \right. \\ & \quad \left. + \left| \mathbf{E}_{\rho_2} h(Y_{1..k}) - \frac{1}{m - k + 1} \sum_{i=1}^{m-k+1} h(Y_{i..i+k-1}) \right| \right\} + \varepsilon \\ & \leq 3\varepsilon + D_{\mathbf{H}}(\rho_X, \rho_Y), \end{aligned}$$

where the first inequality follows from the definition of  $\hat{D}_{\mathbf{H}}$  (2) and from (3) and the last inequality follows from (4). Since  $\varepsilon$  was chosen arbitrary the statement follows.  $\square$

**Lemma 1.1.** Let two samples  $X_{1..n}$  and  $Y_{1..m}$  be generated by stationary distributions  $\rho_X$  and  $\rho_Y$  whose  $\beta$ -mixing coefficients satisfy  $\beta(\rho, t) \leq \gamma^t$  for some  $\gamma < 1$ . Let  $\mathcal{H}_k$ ,  $k \in \mathbb{N}$  be some sets of indicator functions on  $\mathcal{X}^k$  whose VC dimension  $d_k$  is finite and non-decreasing with  $k$ . Then

$$P(|\hat{D}_{\mathbf{H}}(X_{1..n}, Y_{1..m}) - D_{\mathbf{H}}(\rho_X, \rho_Y)| > \varepsilon) \leq 2\Delta(\varepsilon/4, n') \quad (5)$$

where  $n' := \min\{n_1, n_2\}$ , the probability is with respect to  $\rho_X \times \rho_Y$  and

$$\Delta(\varepsilon, n) := -\log \varepsilon (n \gamma^{\sqrt{n} + \log(\varepsilon)} + 8n^{(d - \log \varepsilon + 1)/2} e^{-\sqrt{n}\varepsilon^2/8}). \quad (6)$$

*Proof.* Note that  $\sum_{k=-\log \varepsilon/2}^{\infty} w_k < \varepsilon/2$ . Using this and the definitions (1) and (2) of  $D_{\mathbf{H}}$  and  $\hat{D}_{\mathbf{H}}$  we obtain

$$P(|\hat{D}_{\mathbf{H}}(X_{1..n_1}, Y_{1..n_2}) - D_{\mathbf{H}}(\rho_X, \rho_Y)| > \varepsilon) \leq \sum_{k=1}^{-\log(\varepsilon/2)} (q_n(\rho_X, \mathcal{H}_k, \varepsilon/4) + q_n(\rho_Y, \mathcal{H}_k, \varepsilon/4)),$$

which, together with (6) implies the statement.  $\square$
